# Supplementary material
Source: PubMed Central journal article supplement (PMC2736410)
Supplement: 0902377106_0902377106SI.pdf [file 0902377106_0902377106SI.pdf]

# Supporting Information

Yang et al. 10.1073/pnas.0902377106

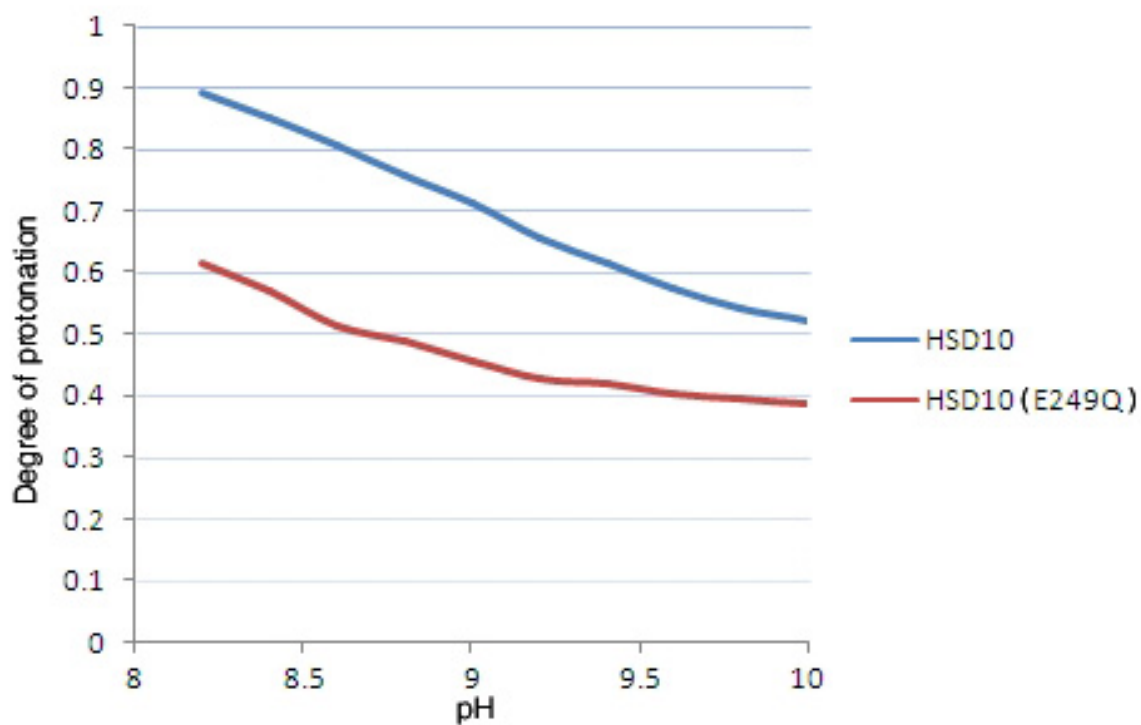

Fig. S1. A portion of the predicted titration curves for lysine 172 in HSD10 (blue line) and HSD10(E249Q) (redline).

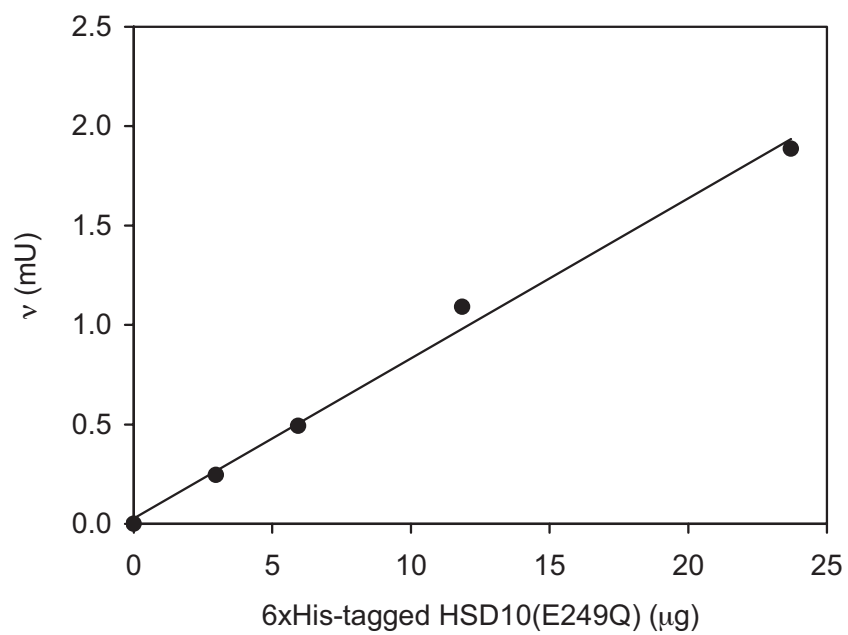

**Fig. S2.** Initial velocities of the oxidative reaction of allopregnanolone ( $51 \mu\text{M}$ ) as a function of the amount of mutant enzyme 6xHis-tagged HSD10(E249Q).

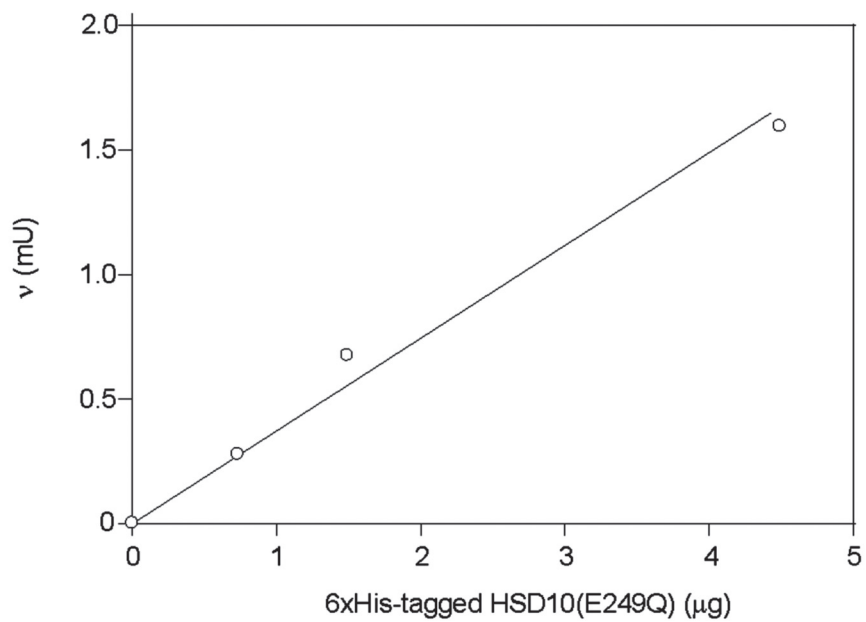

**Fig. S3.** Initial velocities of the dehydrogenation of 2-methyl-3-hydroxybutyryl-CoA ( $16 \mu\text{M}$ ) as a function of the amount of mutant enzyme 6 $\times$ His-tagged HSD10(E249Q).
